# Supplementary material for: Valorization of Sargassum Biomass as Potential Material for the Remediation of Heavy-Metals-Contaminated Waters
Source: MDPI journal article supplement (doi:10.3390/ijerph20032559), 2023-01-31
Supplement: s1 [file s1]

## SUPPORTING INFORMATION

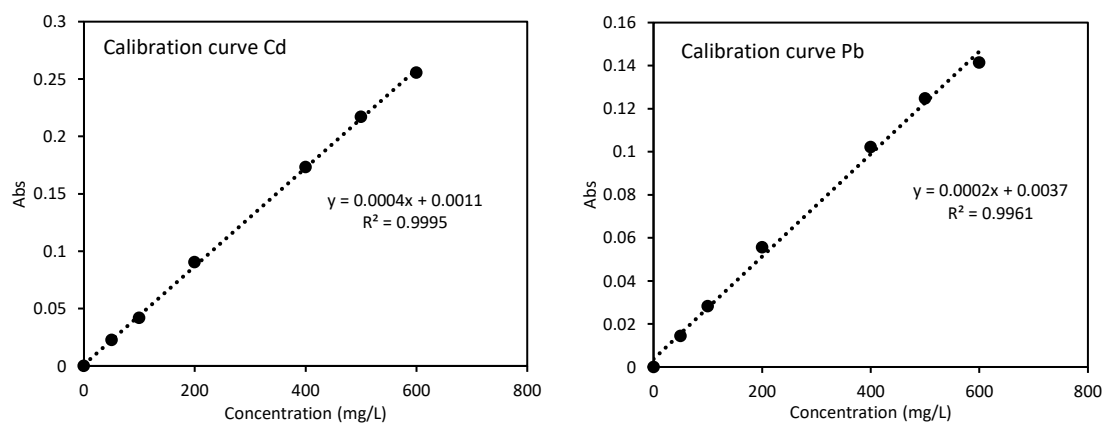

Figure S1. Calibration curve standards of Cd and Pb in aqueous solutions
